# Supplementary material for: Effects of fecal microbiota transplantation and metabolite supplementation on the gut-brain-gonad axis of Trachemys scripta elegans
Source: Research Square preprint supplement (doi:10.21203/rs.3.rs-7111041/v1), 2025-09-16
Supplement: Supplementary file 1 [file 2c91f555d4ec9aef91522672.docx]

Supplementary Table 2

Table S2 Primer Sequence

| Genes | Primer sequence | Product length (bp) |
| --- | --- | --- |
| β-actin | F:GCACCCTGTGCTGCTTACA | 190 |
| R:CACAGTGTGGGTGACACCAT |
| KISS | F:AGGCAGAACCAAGATCCACG | 168 |
| R:ACGAGTTCCAGTTGTAGGCG |
| KISSR | F:CTACGCCTTCATGGGTGTCA | 114 |
| R:ATCTCGGTGTTGACATGGGC |
| GABAR | F:TTCAAGGAGGATCATGCGCT | 94 |
| R:CCTTTTCCACAATGACCGGC |
| DAR | F:GCCATCTGAGGTCCAAGGTG | 84 |
| R:AAGGCATGACCAAGACTGCC |
| 5-HTR | F:GACAGGAGCGATCTCCATCTG | 84 |
| R:ACGTACAGGGCGATGATGC |
| GnRH1 | F:GGAGAAGACCAGGAAGCTCTTTG | 95 |
| R:CCGGTTGCAGGCCATAAGAC |
| GnRH2 | F:CCCGGAGGGAAAAGAGAACT | 150 |
| R:TAGTTGTCTCGCCAGCAGGT |
| FSHβ | F:CGCTATCATGGAGGACTCGC | 101 |
| R:AGTGGTAGCCAGACGCAATG |
| LHβ | F:GGCCGAGAAGGACGACTG | 85 |
| R:GTACACCGGCTCCTTGGTC |
| Continued TableS2 | | |
| ERα | F:GAGGGGGACGCCAGAAATAC | 118 |
| R:GGGTTAATGGGGGCTGGTTT |
| ERβ | F:CGCTATCATGGAGGACTCGC | 101 |
| R:AGTGGTAGCCAGACGCAATG |
| CYP11 | F:GGCAGTGACCCTACAGAGAT | 128 |
| R:CTGGCTTGGTGAAGAACTTGG |
| 3β-HSD | F:TGTCTTTAGCTGGGGTGAGC | 80 |
| R:CTCCAGCAGTAAGCGGACAA |
| AR | F:TTGCTCCCGACTTGGTCTTC | 103 |
| R:TGAAGCCATCCGAACTCCTG |
| StAR | F:CTGTGTGCCGGGATCTCCTA | 83 |
| R:AGTTCCTGGCTGATGGCAAC |
| GFRα-1 | F:CAAGCGGAAGTGTCATAAGGC | 80 |
| R:AGCAGAAGAGCATCCCGTAG |
| RAS | F:GAGACCAATACATGCGGACG | 149 |
| R:CTTGTTTCCCACCAACACCA |
| ER K | F:TCAACACCTCAGCAACGACC | 91 |
| R:ACGATGCAACACATTGGCTG |
| RARα | F:GAGCTGCATCATCAACAAGGTG | 156 |
| R:AGGATGTAGCTCTCCGAACAC |
| Continued TableS2 | | |
| NRG3 | F:GAAGAGGTGTACCAACGCCA | 86 |
| R:TAGAACGCAGCACAGAGCAT |
| ERBB4 | F:CTGATTGCTTTGCCTGCATGA | 115 |
| R:TTGGCATTGTGGTTGTGCTC |
| Stra8 | F:AAGAGGATGGGAAGCCAAGA | 154 |
| R:ACCACAGGAAGAGTGACCTC |
| PLZF | F:GGAATACGCTTACACGGCCA | 81 |
| R:ATTTCTAGGATCTCGGCTGCG |
