# Supplementary material for: Effects of fecal microbiota transplantation and metabolite supplementation on the gut-brain-gonad axis of Trachemys scripta elegans
Source: Research Square preprint supplement (doi:10.21203/rs.3.rs-7111041/v1), 2025-09-16
Supplement: Supplementary file 2 [file 50ff950b13b6dee9b11bd35d.docx]

Supplementary Figure 1


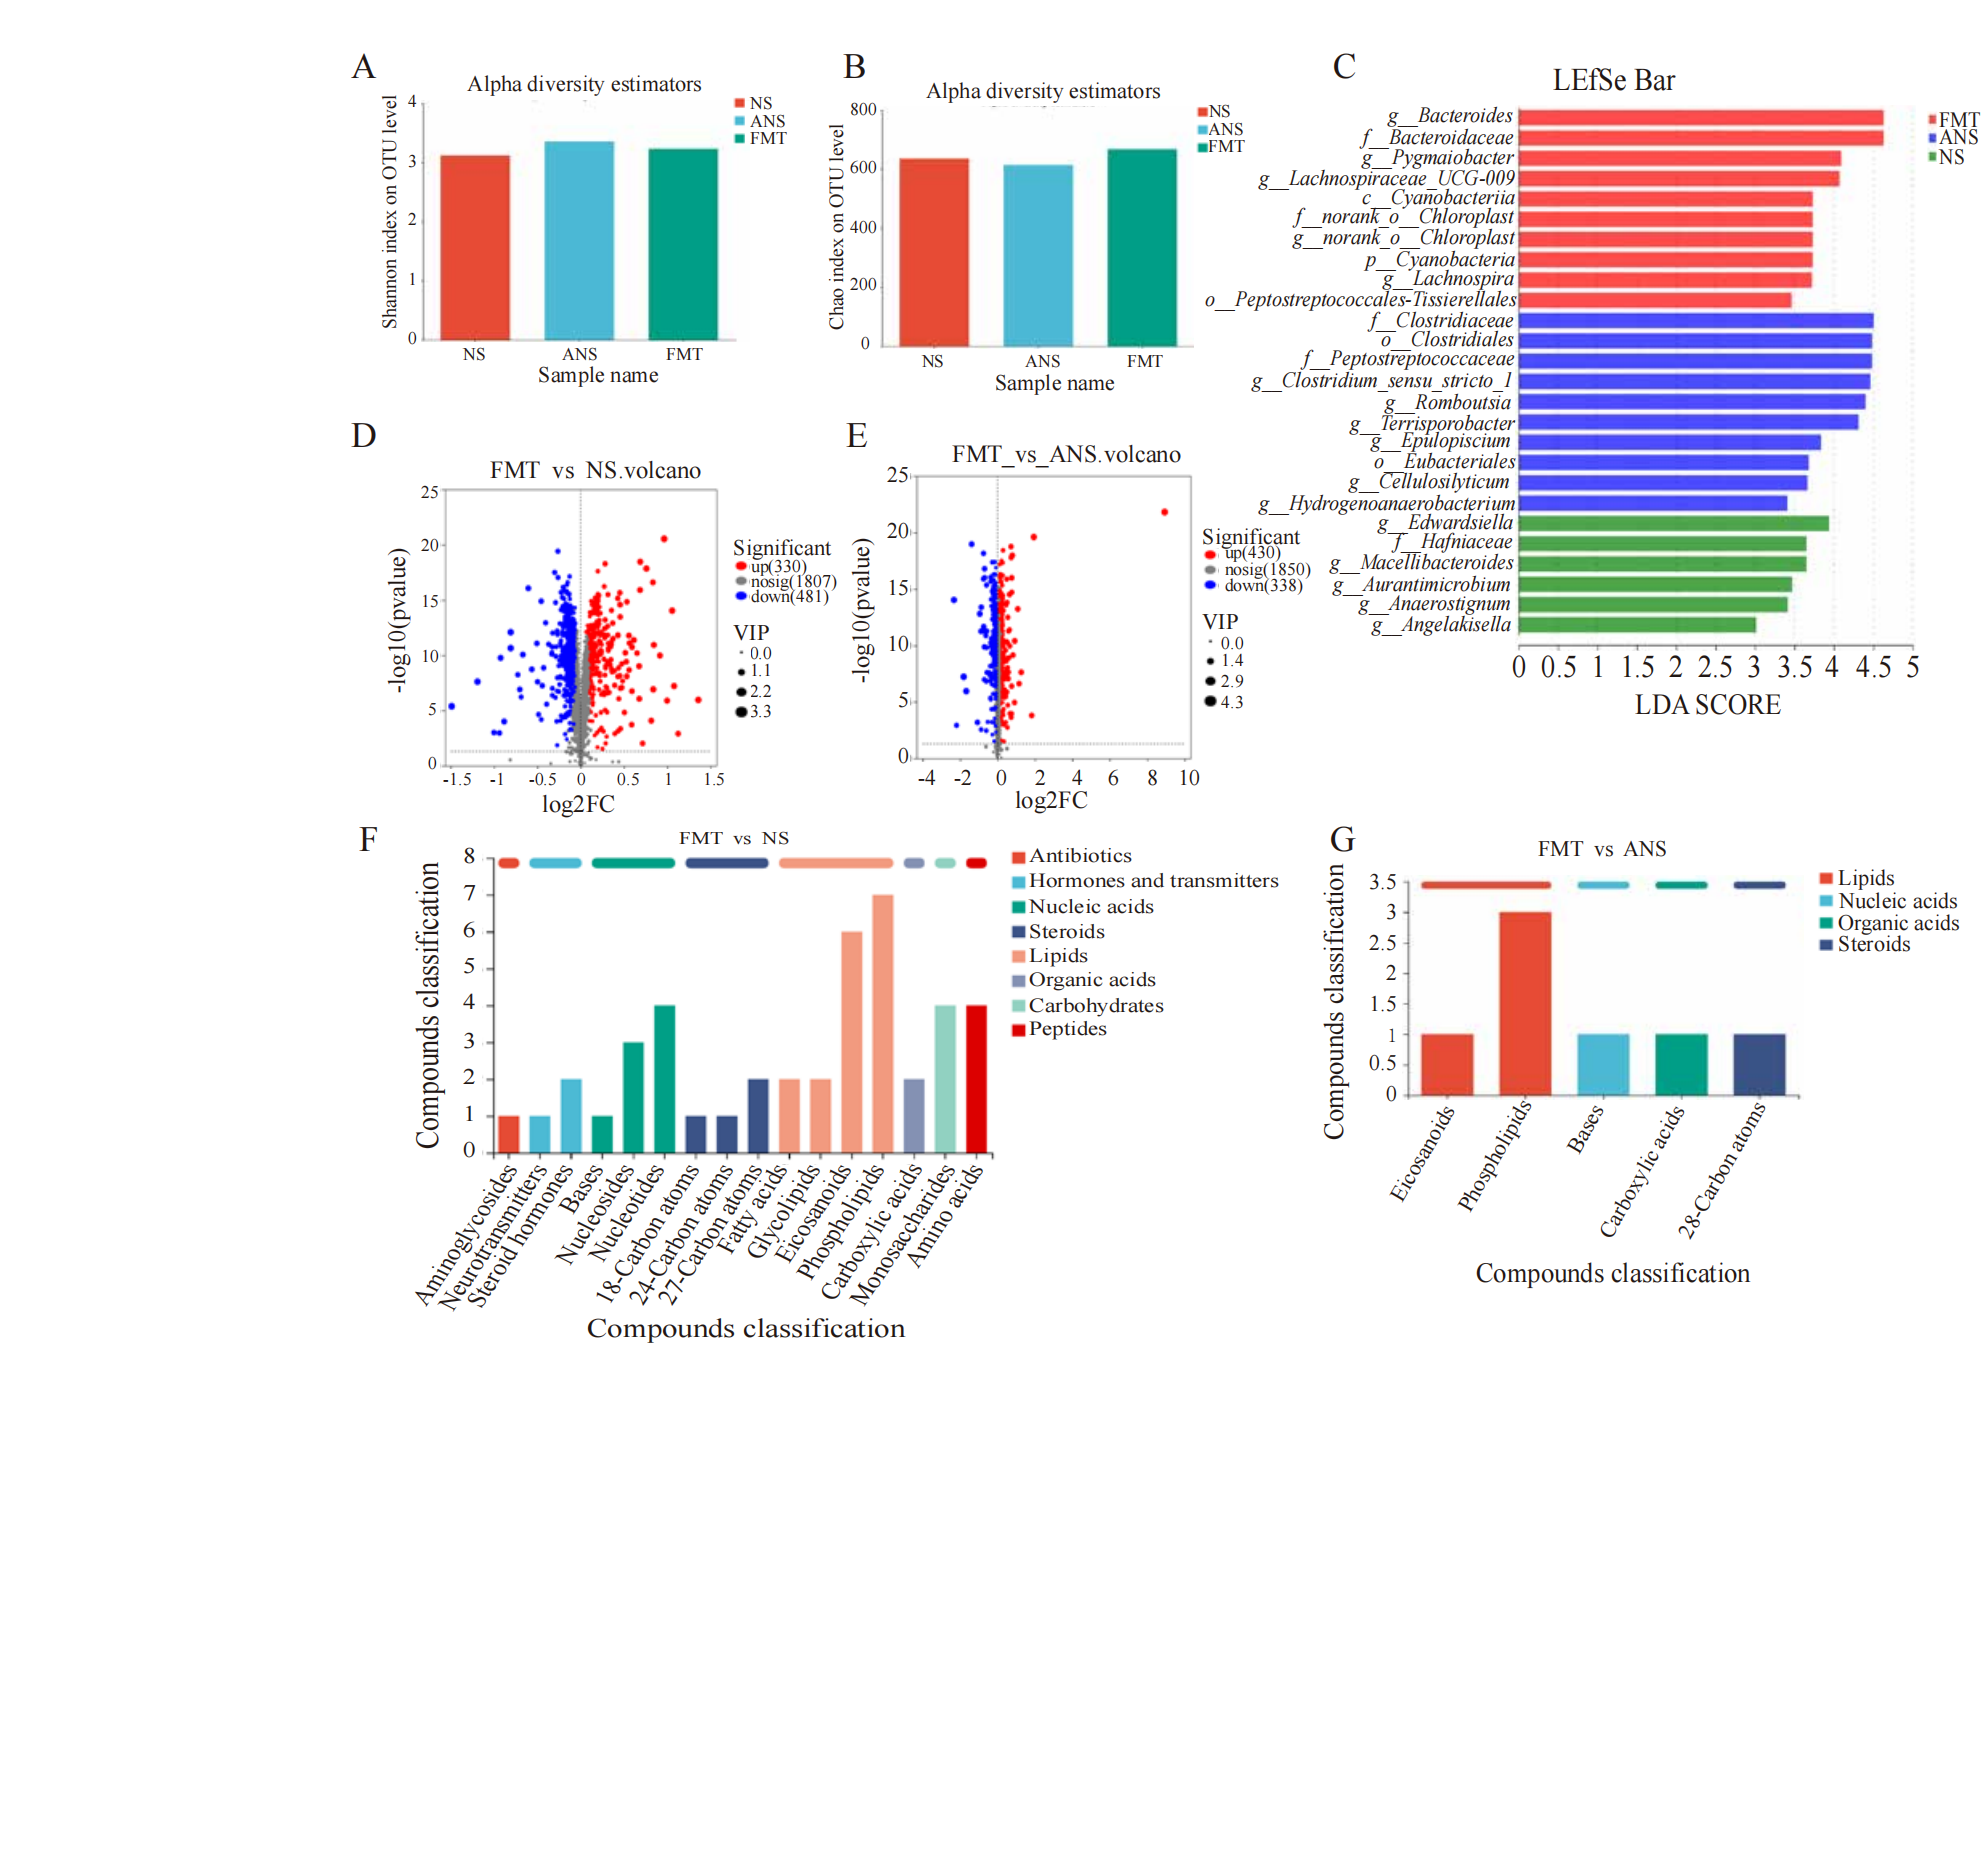


Figure S1: Effect of FMT on the intestinal microbiota and metabolites of *T. s. elegans*.

A: Shannon Index. B: Chao index. C: LEfSe Difference Analysis. D: Volcano map of the differences between the FMT group and the NS group. E: Volcano map of the differences between the FMT and ANS groups. F: Classification of KEGG compounds of differential metabolites between the FMT group and the NS group. G: Classification of KEGG compounds of differential metabolites between the FMT group and the ANS group.
