# Supplementary material for: Effects of fecal microbiota transplantation and metabolite supplementation on the gut-brain-gonad axis of Trachemys scripta elegans
Source: Research Square preprint supplement (doi:10.21203/rs.3.rs-7111041/v1), 2025-09-16
Supplement: Supplementary file 3 [file adaa0300e6cbfebf2f50c6cd.docx]

Supplementary Table 1

Table S1 Nutrient levels of Commercial Feed

| Nutrient levels | Content （%） |
| --- | --- |
| Crude Protein | 42.0 |
| Crude Fat | 4.0 |
| Crude Ash | 16.0 |
| Crude Fiber | 8.0 |
| Moisture | 10.0 |
| Calcium | 4.5 |
| Total Phosphorus | 1.5 |
| Lys | 1.5 |
