# Supplementary material for: Effects of fecal microbiota transplantation and metabolite supplementation on the gut-brain-gonad axis of Trachemys scripta elegans
Source: Research Square preprint supplement (doi:10.21203/rs.3.rs-7111041/v1), 2025-09-16
Supplement: Supplementary file 4 [file b2ebe289288e1572e795fd1c.docx]

Supplementary Figure 2


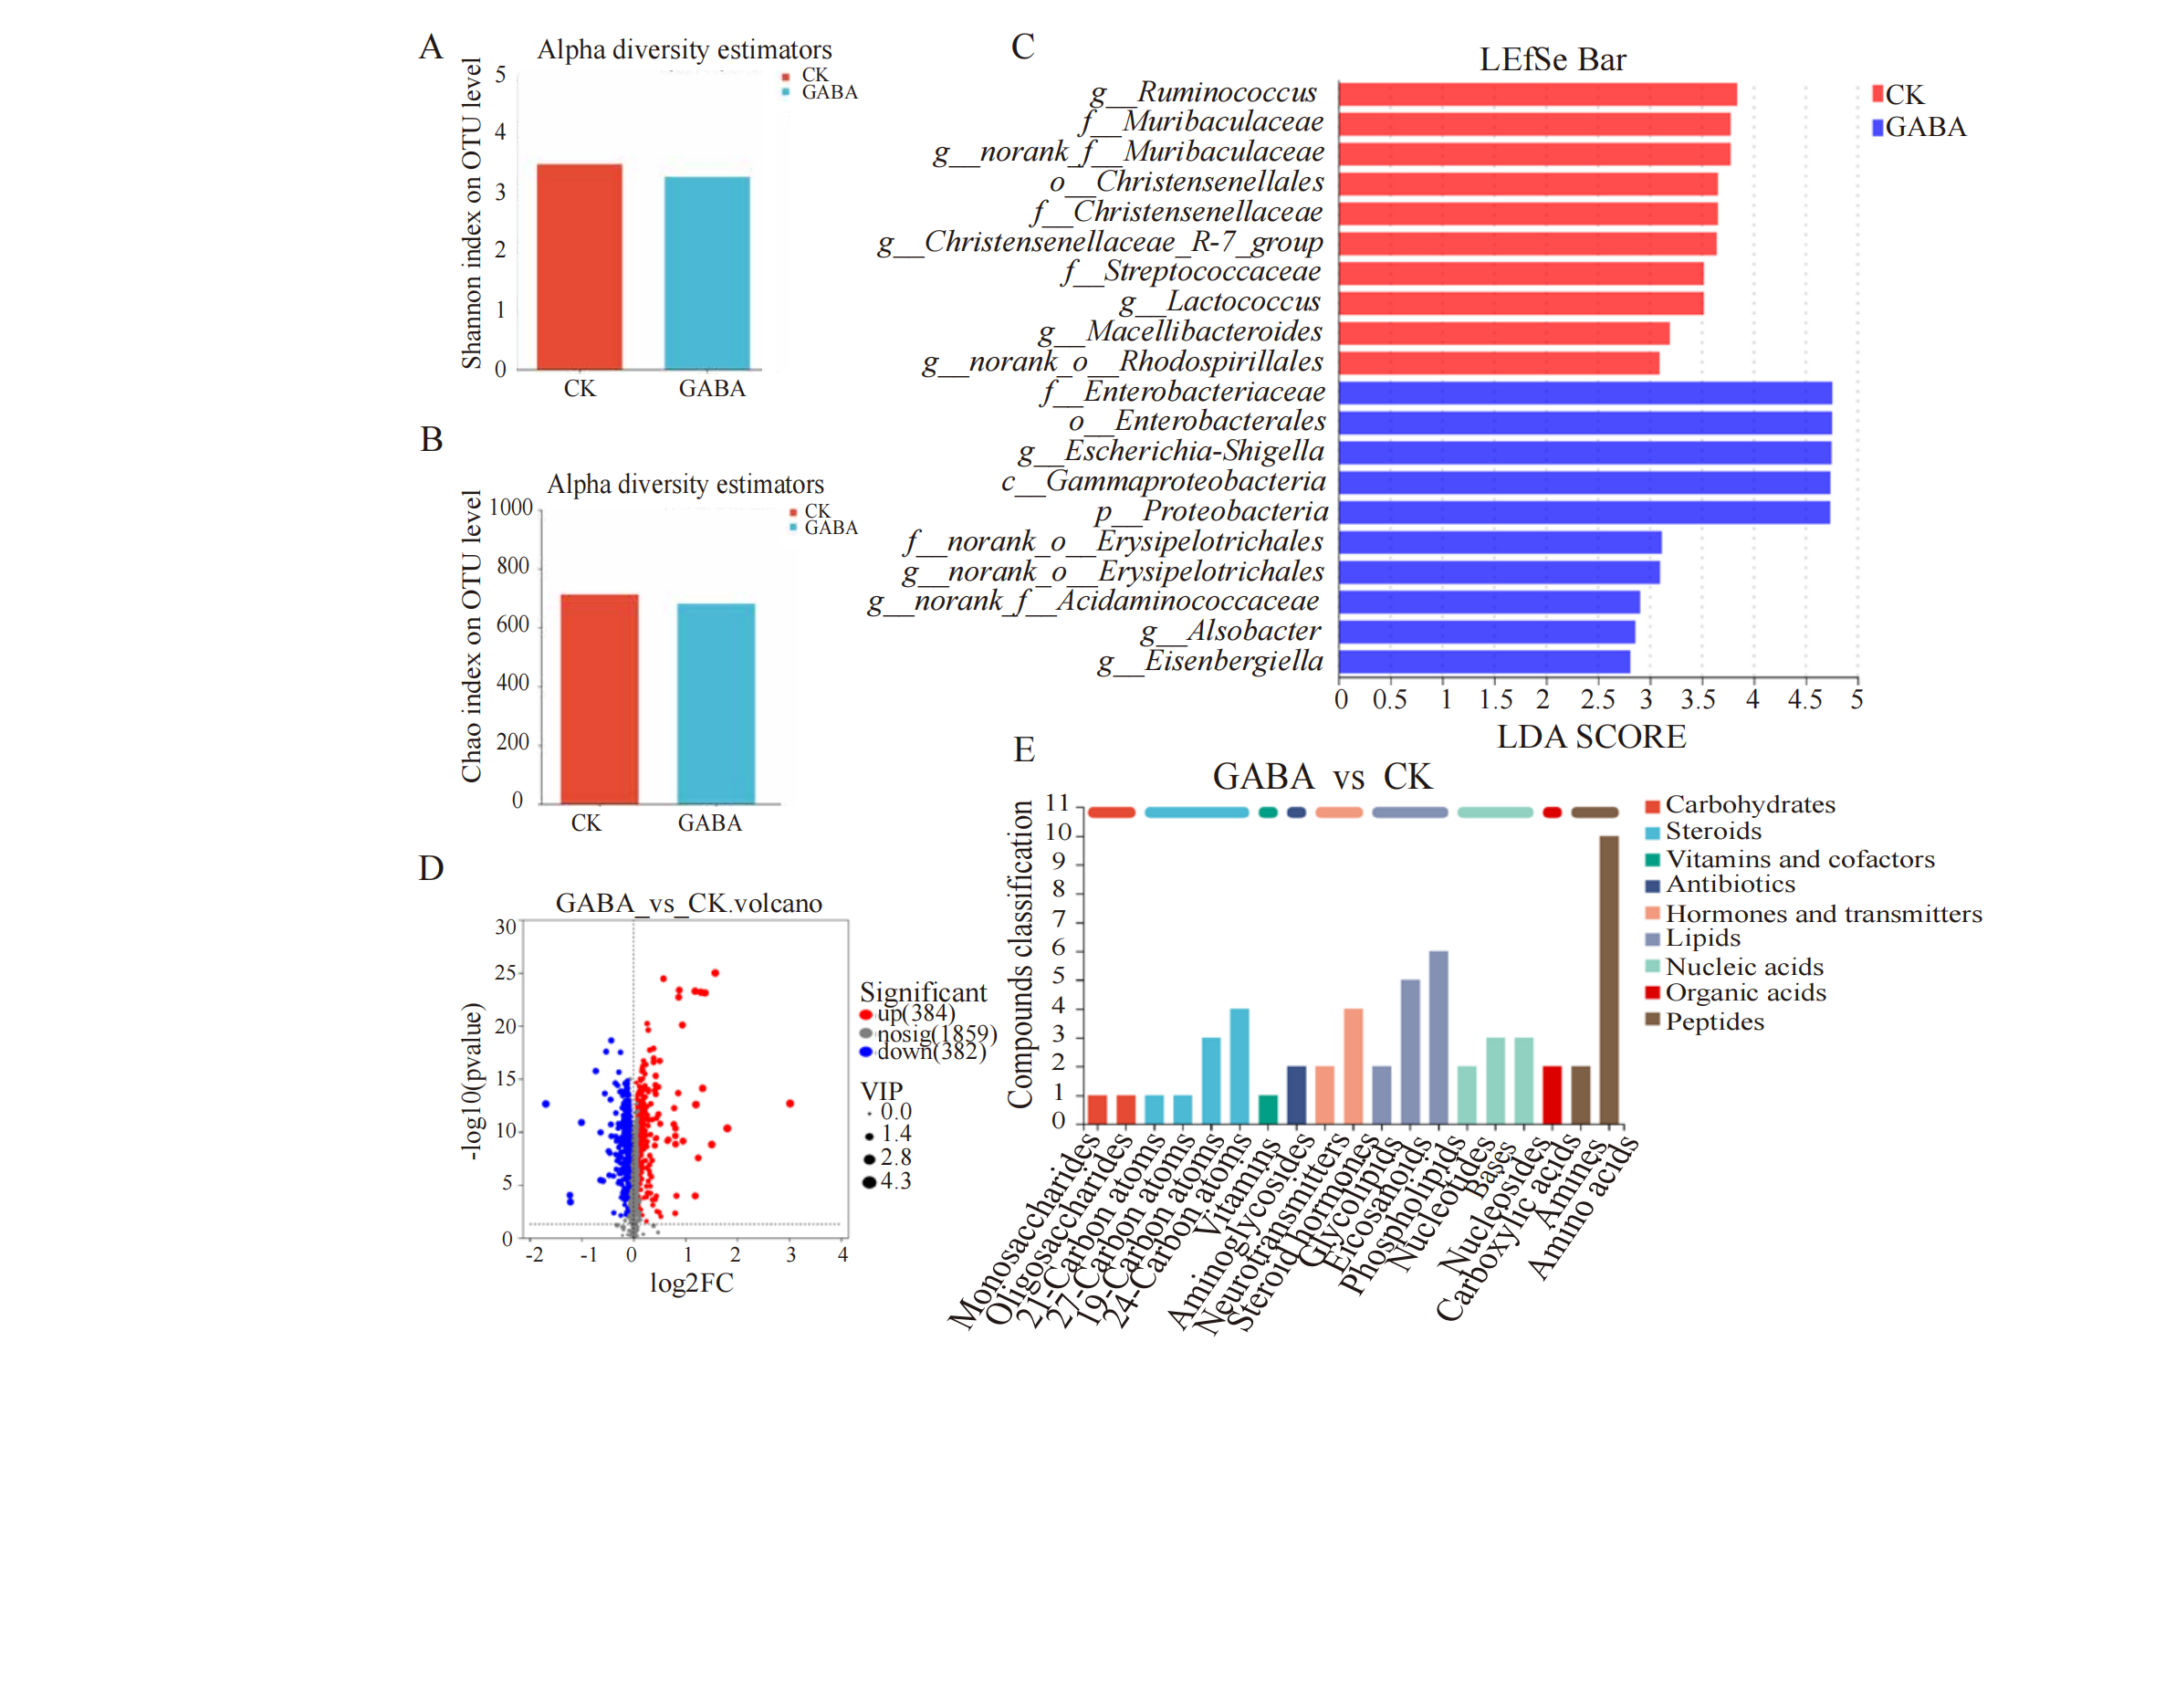


Figure S2: Effects of GABA supplementation on the intestinal microbiota and metabolites of *T. s. elegans*.

A: Shannon Index. B: Chao index. C: LEfSe Difference Analysis. D: Volcano map of the metabolites differences between the GABA and CK groups. E: Classification of KEGG compounds of differential metabolites between the GABA group and the CK group.
