# Supplementary material for: Effects of fecal microbiota transplantation and metabolite supplementation on the gut-brain-gonad axis of Trachemys scripta elegans
Source: Research Square preprint supplement (doi:10.21203/rs.3.rs-7111041/v1), 2025-09-16
Supplement: Supplementary file 5 [file d1324e396f80bc9a0cb7b8cd.docx]

Supplementary Figure 3


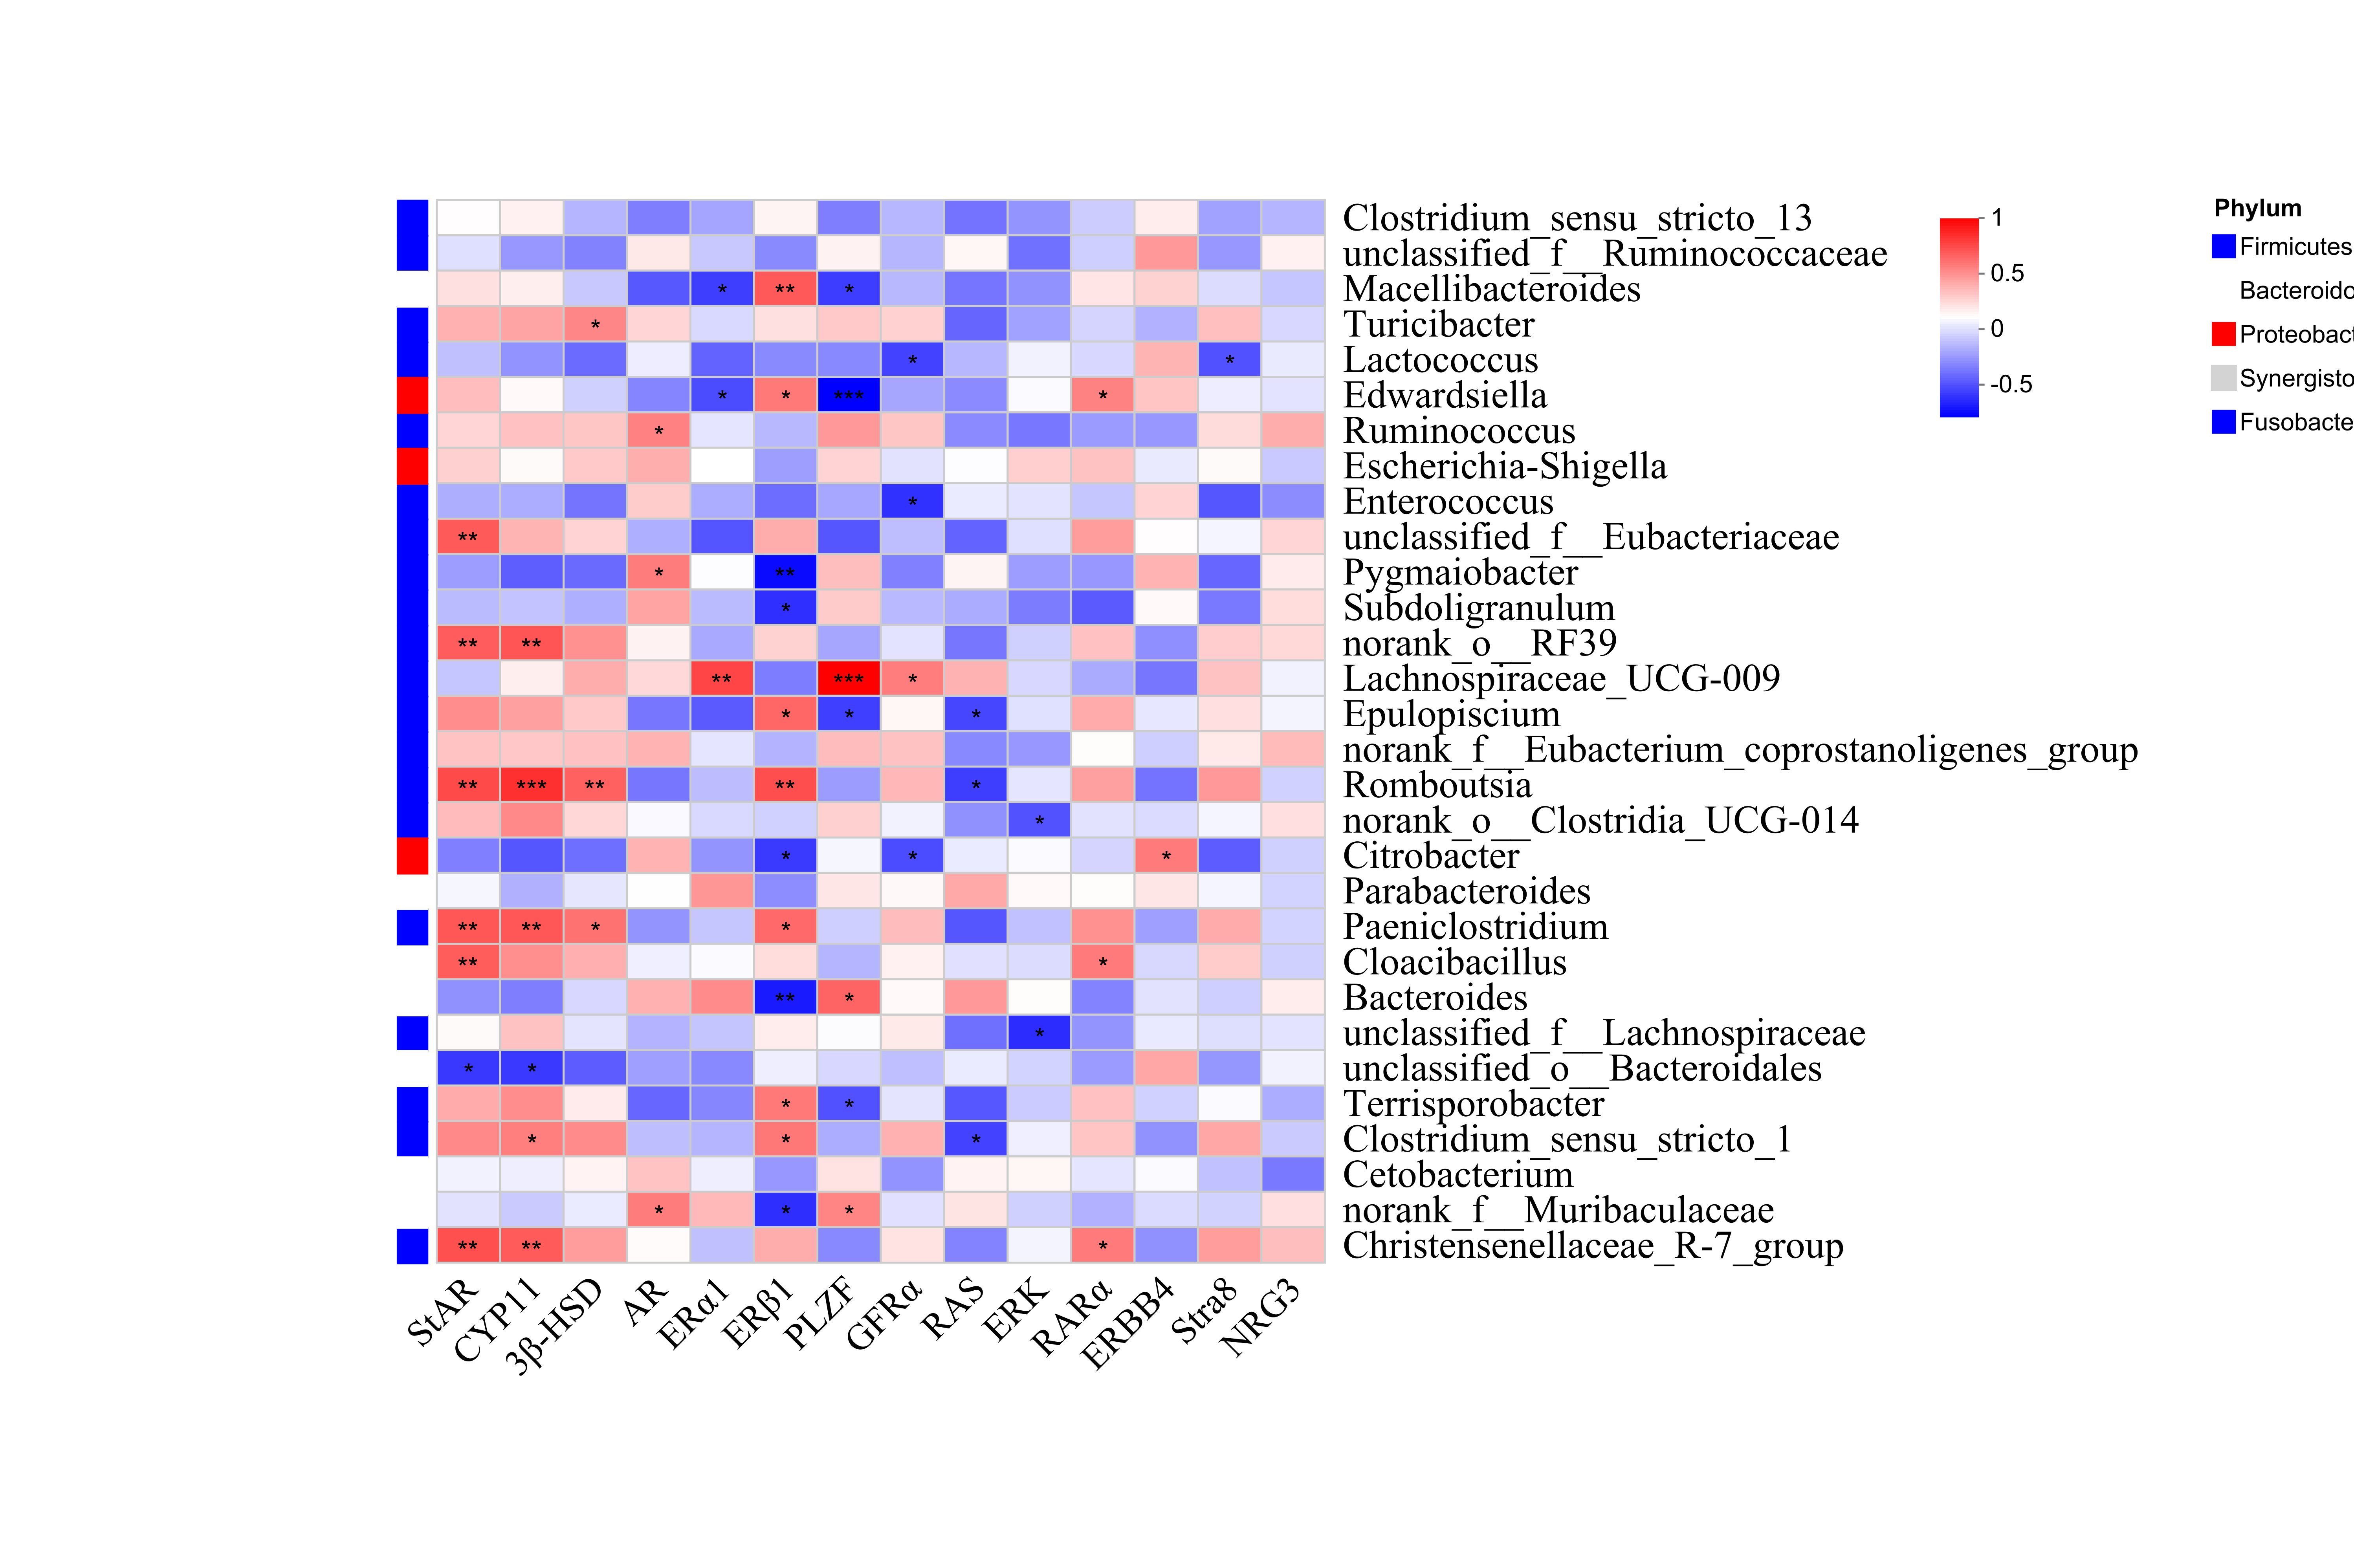


Figure S3: Correlation analysis between intestinal flora and spermatogenesis genes. The right side of the figure is intestinal flora, and the bottom is the name of genes related to spermatogenesis, with red representing a positive correlation and blue representing a negative correlation. **P <* 0.05, ***P <* 0.01, ****P <* 0.001.
